# Supplementary material for: Predicting the Clinical Outcome of Triple-Negative Breast Cancer Based on the Gene Expression Characteristics of Necroptosis and Different Molecular Subtypes
Source: Hindawi journal article supplement (doi:10.1155/2023/8427767), 2023-02-20

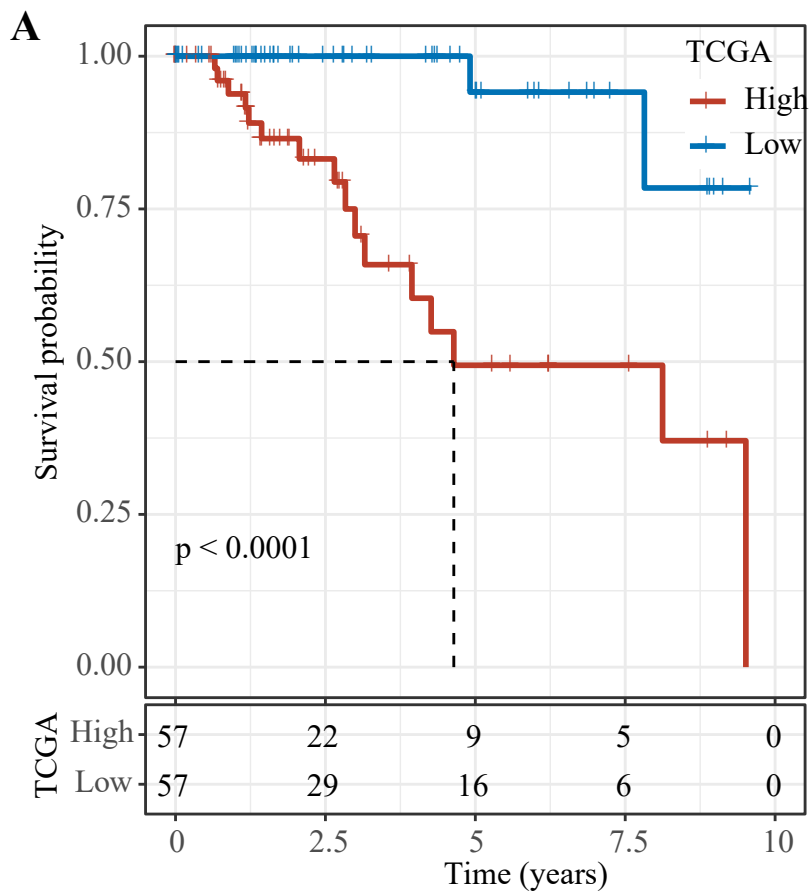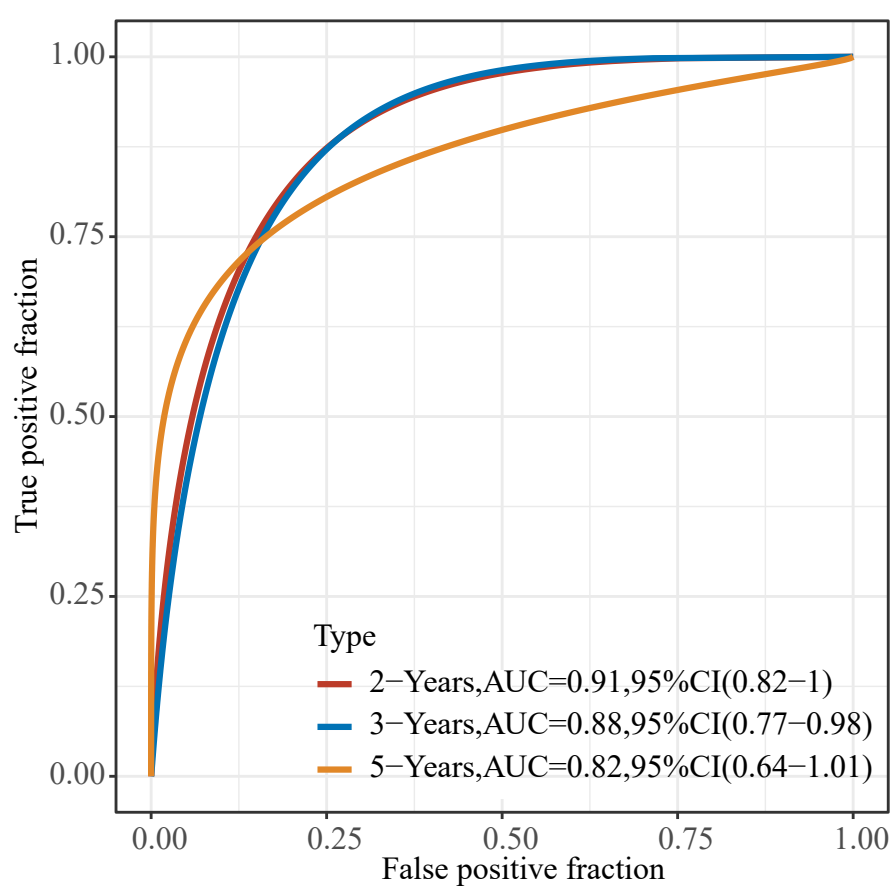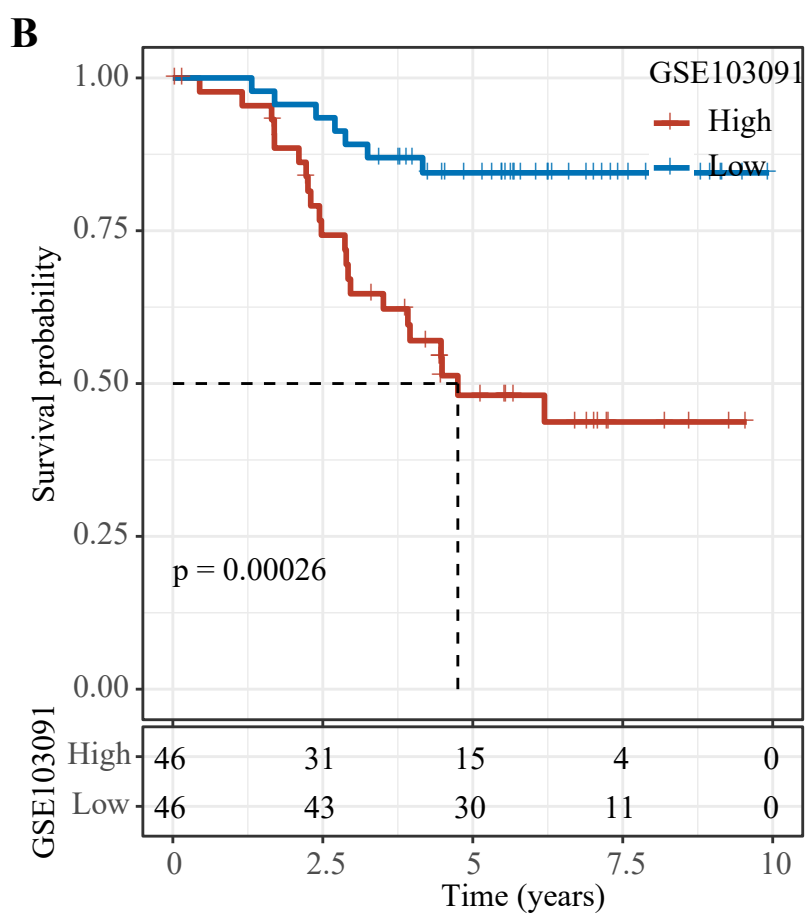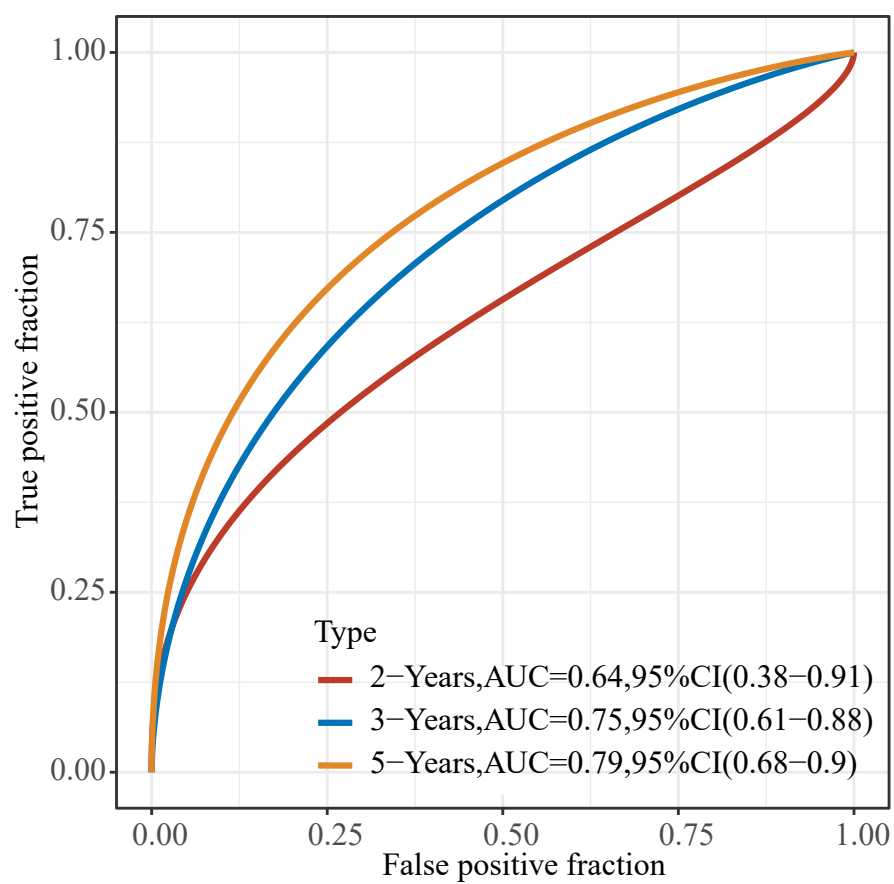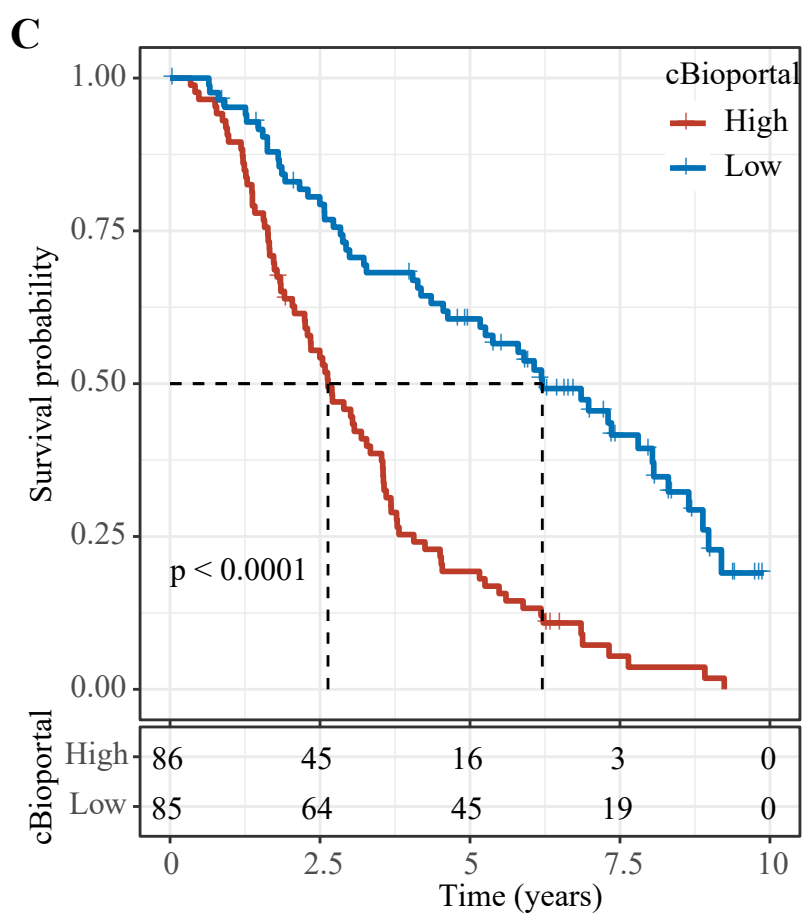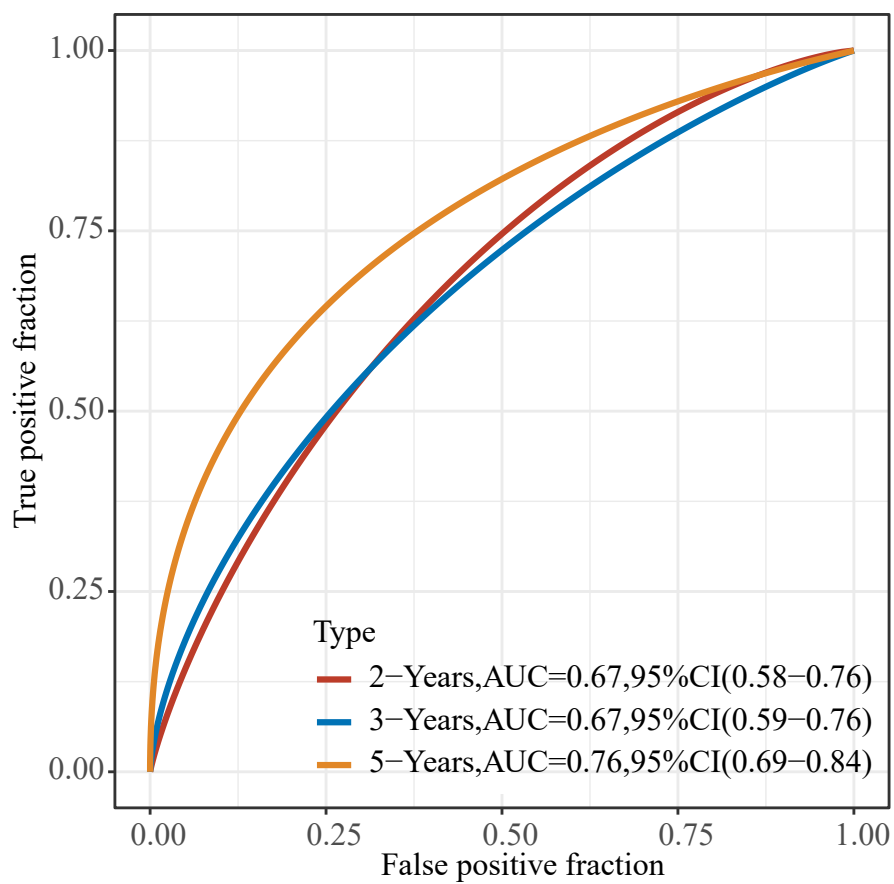

Supplement: f2 [file 8427767.f2.pdf]
